# Supplementary material for: Doctor-patient communication and trust in doctors during COVID 19 times—A cross sectional study in Chennai, India
Source: PubMed Central journal article supplement (PMC8221523; doi:10.1371/journal.pone.0253497), 2021-06-23

# PLOS ONE

## Doctor-patient communication and trust in doctors during COVID 19 times – a cross sectional study in Chennai, India --Manuscript Draft--

|                                                                                                                                                                                                                                                                                          |                                                                                                                                                                                                                                                                                                                                                                                                                                                                                                                                                                                                                                                                                                                                                                                                                                                                                                                                                                                                                                                                                                                                                                                                                                                                                                                                                                                                                                                                                                                                                                                                                                                                                                                                                                                                                                                                                                                                                                                                                                                                                                           |
|------------------------------------------------------------------------------------------------------------------------------------------------------------------------------------------------------------------------------------------------------------------------------------------|-----------------------------------------------------------------------------------------------------------------------------------------------------------------------------------------------------------------------------------------------------------------------------------------------------------------------------------------------------------------------------------------------------------------------------------------------------------------------------------------------------------------------------------------------------------------------------------------------------------------------------------------------------------------------------------------------------------------------------------------------------------------------------------------------------------------------------------------------------------------------------------------------------------------------------------------------------------------------------------------------------------------------------------------------------------------------------------------------------------------------------------------------------------------------------------------------------------------------------------------------------------------------------------------------------------------------------------------------------------------------------------------------------------------------------------------------------------------------------------------------------------------------------------------------------------------------------------------------------------------------------------------------------------------------------------------------------------------------------------------------------------------------------------------------------------------------------------------------------------------------------------------------------------------------------------------------------------------------------------------------------------------------------------------------------------------------------------------------------------|
| <b>Manuscript Number:</b>                                                                                                                                                                                                                                                                | PONE-D-21-08356                                                                                                                                                                                                                                                                                                                                                                                                                                                                                                                                                                                                                                                                                                                                                                                                                                                                                                                                                                                                                                                                                                                                                                                                                                                                                                                                                                                                                                                                                                                                                                                                                                                                                                                                                                                                                                                                                                                                                                                                                                                                                           |
| <b>Article Type:</b>                                                                                                                                                                                                                                                                     | Research Article                                                                                                                                                                                                                                                                                                                                                                                                                                                                                                                                                                                                                                                                                                                                                                                                                                                                                                                                                                                                                                                                                                                                                                                                                                                                                                                                                                                                                                                                                                                                                                                                                                                                                                                                                                                                                                                                                                                                                                                                                                                                                          |
| <b>Full Title:</b>                                                                                                                                                                                                                                                                       | Doctor-patient communication and trust in doctors during COVID 19 times – a cross sectional study in Chennai, India                                                                                                                                                                                                                                                                                                                                                                                                                                                                                                                                                                                                                                                                                                                                                                                                                                                                                                                                                                                                                                                                                                                                                                                                                                                                                                                                                                                                                                                                                                                                                                                                                                                                                                                                                                                                                                                                                                                                                                                       |
| <b>Short Title:</b>                                                                                                                                                                                                                                                                      | Doctor patient communication and trust during COVID 19 times                                                                                                                                                                                                                                                                                                                                                                                                                                                                                                                                                                                                                                                                                                                                                                                                                                                                                                                                                                                                                                                                                                                                                                                                                                                                                                                                                                                                                                                                                                                                                                                                                                                                                                                                                                                                                                                                                                                                                                                                                                              |
| <b>Corresponding Author:</b>                                                                                                                                                                                                                                                             | Vijayaprasad Gopichandran<br>ESIC Medical College & PGIMSR<br>Chennai, Tamil Nadu INDIA                                                                                                                                                                                                                                                                                                                                                                                                                                                                                                                                                                                                                                                                                                                                                                                                                                                                                                                                                                                                                                                                                                                                                                                                                                                                                                                                                                                                                                                                                                                                                                                                                                                                                                                                                                                                                                                                                                                                                                                                                   |
| <b>Keywords:</b>                                                                                                                                                                                                                                                                         | COVID 19; doctor-patient communication; trust in doctors; face mask; personal protective equipment                                                                                                                                                                                                                                                                                                                                                                                                                                                                                                                                                                                                                                                                                                                                                                                                                                                                                                                                                                                                                                                                                                                                                                                                                                                                                                                                                                                                                                                                                                                                                                                                                                                                                                                                                                                                                                                                                                                                                                                                        |
| <b>Abstract:</b>                                                                                                                                                                                                                                                                         | <p>Background: The COVID 19 pandemic created a global public health crisis. Physical distancing, masks, personal protective equipment worn by the doctors created difficulties in effective doctor-patient communication. Objectives: This study was conducted to assess the difficulties faced by patients in communicating with their doctors due to the COVID 19 preventive measures, and its impact on the trust on their doctors. Methods: A cross sectional study of 359 persons attending a tertiary care center in Chennai, sampled in a non-probabilistic manner selected from the outpatient department, wards, and isolation facilities, was conducted using a questionnaire containing items covering three dimensions namely difficulties faced in accessing the health facility, difficulties in doctor-patient communication and trust in the doctors. The data were collected using Google Forms and analyzed using GNU PSPP open-source statistical software version 1.4.0. Results: More than 60% of the participants complained of difficulty in accessing the health facility. More than 60% had difficulties in communicating with the doctors. There was a high level of trust in doctors among more than 80% of the participants. Comparison of the mean scores revealed that accessibility was a problem across ages, sexes, education and occupation groups. Communication barriers decreased with age and increased with education, but trust increased with age, but reduced with increasing education. Multivariable linear regression analysis revealed that difficulties in communication had a negative impact on trust (<math>b = -0.63</math>, <math>p &lt; 0.001</math>) and increasing education had a negative impact on trust (<math>b = -0.42</math>, <math>p = 0.034</math>). Conclusions: The COVID 19 pandemic and the preventive strategies such as lock-down, physical distancing, face mask and personal protective equipment created barriers to effective doctor patient communication and led to some compromise in trust in doctors during this time.</p> |
| <b>Order of Authors:</b>                                                                                                                                                                                                                                                                 | Vijayaprasad Gopichandran<br>Kalirajan Sakthivel                                                                                                                                                                                                                                                                                                                                                                                                                                                                                                                                                                                                                                                                                                                                                                                                                                                                                                                                                                                                                                                                                                                                                                                                                                                                                                                                                                                                                                                                                                                                                                                                                                                                                                                                                                                                                                                                                                                                                                                                                                                          |
| <b>Additional Information:</b>                                                                                                                                                                                                                                                           |                                                                                                                                                                                                                                                                                                                                                                                                                                                                                                                                                                                                                                                                                                                                                                                                                                                                                                                                                                                                                                                                                                                                                                                                                                                                                                                                                                                                                                                                                                                                                                                                                                                                                                                                                                                                                                                                                                                                                                                                                                                                                                           |
| <b>Question</b>                                                                                                                                                                                                                                                                          | <b>Response</b>                                                                                                                                                                                                                                                                                                                                                                                                                                                                                                                                                                                                                                                                                                                                                                                                                                                                                                                                                                                                                                                                                                                                                                                                                                                                                                                                                                                                                                                                                                                                                                                                                                                                                                                                                                                                                                                                                                                                                                                                                                                                                           |
| <b>Financial Disclosure</b>                                                                                                                                                                                                                                                              | The authors received no specific funding for this work.                                                                                                                                                                                                                                                                                                                                                                                                                                                                                                                                                                                                                                                                                                                                                                                                                                                                                                                                                                                                                                                                                                                                                                                                                                                                                                                                                                                                                                                                                                                                                                                                                                                                                                                                                                                                                                                                                                                                                                                                                                                   |
| Enter a financial disclosure statement that describes the sources of funding for the work included in this submission. Review the <a href="#">submission guidelines</a> for detailed requirements. View published research articles from <a href="#">PLOS ONE</a> for specific examples. |                                                                                                                                                                                                                                                                                                                                                                                                                                                                                                                                                                                                                                                                                                                                                                                                                                                                                                                                                                                                                                                                                                                                                                                                                                                                                                                                                                                                                                                                                                                                                                                                                                                                                                                                                                                                                                                                                                                                                                                                                                                                                                           |

This statement is required for submission and **will appear in the published article** if the submission is accepted. Please make sure it is accurate.

#### Unfunded studies

Enter: *The author(s) received no specific funding for this work.*

#### Funded studies

Enter a statement with the following details:

- Initials of the authors who received each award
- Grant numbers awarded to each author
- The full name of each funder
- URL of each funder website
- Did the sponsors or funders play any role in the study design, data collection and analysis, decision to publish, or preparation of the manuscript?
- **NO** - Include this sentence at the end of your statement: *The funders had no role in study design, data collection and analysis, decision to publish, or preparation of the manuscript.*
- **YES** - Specify the role(s) played.

\* typeset

#### Competing Interests

Use the instructions below to enter a competing interest statement for this submission. On behalf of all authors, disclose any [competing interests](#) that could be perceived to bias this work—acknowledging all financial support and any other relevant financial or non-financial competing interests.

This statement is **required** for submission and **will appear in the published article** if the submission is accepted. Please make sure it is accurate and that any funding sources listed in your Funding Information later in the submission form are also declared in your Financial Disclosure statement.

View published research articles from [PLOS ONE](#) for specific examples.

The authors declare that no competing interests exist.

### NO authors have competing interests

Enter: *The authors have declared that no competing interests exist.*

### Authors with competing interests

Enter competing interest details beginning with this statement:

*I have read the journal's policy and the authors of this manuscript have the following competing interests: [insert competing interests here]*

\* typeset

### Ethics Statement

Enter an ethics statement for this submission. This statement is required if the study involved:

- Human participants
- Human specimens or tissue
- Vertebrate animals or cephalopods
- Vertebrate embryos or tissues
- Field research

Write "N/A" if the submission does not require an ethics statement.

General guidance is provided below.

Consult the [submission guidelines](#) for detailed instructions. **Make sure that all information entered here is included in the Methods section of the manuscript.**

The study was approved by the Institutional Ethics Committee of ESIC Medical College and PGIMSR, KK Nagar, Chennai after an expedited review process with the approval number IEC/2020/1/16 dated 29.07.2020. All interviews were conducted after obtaining oral informed consent. The Institutional Ethics Committee waived the requirement of a written informed consent in order to minimize the use of potential fomites of transmission of COVID 19 through the paper and pen on which the consent would be signed. The consent was documented in the Google Form survey platform used for data collection.

**Format for specific study types**

**Human Subject Research (involving human participants and/or tissue)**

- Give the name of the institutional review board or ethics committee that approved the study
- Include the approval number and/or a statement indicating approval of this research
- Indicate the form of consent obtained (written/oral) or the reason that consent was not obtained (e.g. the data were analyzed anonymously)

**Animal Research (involving vertebrate animals, embryos or tissues)**

- Provide the name of the Institutional Animal Care and Use Committee (IACUC) or other relevant ethics board that reviewed the study protocol, and indicate whether they approved this research or granted a formal waiver of ethical approval
- Include an approval number if one was obtained
- If the study involved *non-human primates*, add *additional details* about animal welfare and steps taken to ameliorate suffering
- If anesthesia, euthanasia, or any kind of animal sacrifice is part of the study, include briefly which substances and/or methods were applied

**Field Research**

Include the following details if this study involves the collection of plant, animal, or other materials from a natural setting:

- Field permit number
- Name of the institution or relevant body that granted permission

**Data Availability**

Authors are required to make all data underlying the findings described fully available, without restriction, and from the time of publication. PLOS allows rare exceptions to address legal and ethical concerns. See the [PLOS Data Policy](#) and [FAQ](#) for detailed information.

Yes - all data are fully available without restriction

A Data Availability Statement describing where the data can be found is required at submission. Your answers to this question constitute the Data Availability Statement and **will be published in the article**, if accepted.

**Important:** Stating 'data available on request from the author' is not sufficient. If your data are only available upon request, select 'No' for the first question and explain your exceptional situation in the text box.

Do the authors confirm that all data underlying the findings described in their manuscript are fully available without restriction?

**Describe where the data may be found in full sentences. If you are copying our sample text, replace any instances of XXX with the appropriate details.**

- If the data are **held or will be held in a public repository**, include URLs, accession numbers or DOIs. If this information will only be available after acceptance, indicate this by ticking the box below. For example: *All XXX files are available from the XXX database (accession number(s) XXX, XXX).*
- If the data are all contained **within the manuscript and/or Supporting Information files**, enter the following: *All relevant data are within the manuscript and its Supporting Information files.*
- If neither of these applies but you are able to provide **details of access elsewhere**, with or without limitations, please do so. For example:

*Data cannot be shared publicly because of [XXX]. Data are available from the XXX Institutional Data Access / Ethics Committee (contact via XXX) for researchers who meet the criteria for access to confidential data.*

*The data underlying the results presented in the study are available from (include the name of the third party*

the data of the study are available freely from the corresponding author of this manuscript on sending an email to vijay.gopichandran@gmail.com

*and contact information or URL).*

- This text is appropriate if the data are owned by a third party and authors do not have permission to share the data.

\* typeset

Additional data availability information:

1 **Doctor-patient communication and trust in doctors during COVID 19 times – a cross sectional**  
2 **study in Chennai, India.**

3 **Short title: Doctor patient communication and trust during COVID 19 times**

4  
5 **Vijayaprasad Gopichandran\***

6 **Kalirajan Sakthivel\*\***

7  
8 \*Assistant Professor, Department of Community Medicine, ESIC Medical College and PGIMSR, KK  
9 Nagar, Chennai 600078, India email: [vijay.gopichandran@gmail.com](mailto:vijay.gopichandran@gmail.com)

10 \*\*Resident Intern, ESIC Medical College and PGIMSR, KK Nagar, Chennai 600078, India email:  
11 [rajansakthivel21@gmail.com](mailto:rajansakthivel21@gmail.com)

12  
13 Corresponding Author

14 Vijayaprasad Gopichandran

15 Assistant Professor

16 Department of Community Medicine

17 ESIC Medical College and PGIMSR

18 KK Nagar

19 Chennai 600078, India

20 Email: [vijay.gopichandran@gmail.com](mailto:vijay.gopichandran@gmail.com)

21 Phone: +919445226806

22

23

24 **Abstract** 

25 **Background:** The COVID 19 pandemic created a global public health crisis. Physical distancing,  
26 masks, personal protective equipment worn by the doctors created difficulties in effective doctor-  
27 patient communication. **Objectives:** This study was conducted to assess the difficulties faced by  
28 patients in communicating with their doctors due to the COVID 19 preventive measures, and its  
29 impact on the trust on their doctors. **Methods:** A cross sectional study of 359 persons attending a  
30 tertiary care center in Chennai, sampled in a non-probabilistic manner selected from the outpatient  
31 department, wards, and isolation facilities, was conducted using a questionnaire containing items  
32 covering three dimensions namely difficulties faced in accessing the health facility, difficulties in  
33 doctor-patient communication and trust in the doctors. The data were collected using Google Forms  
34 and analyzed using GNU PSPP open-source statistical software version 1.4.0. **Results:** More than  
35 60% of the participants complained of difficulty in accessing the health facility. More than 60% had  
36 difficulties in communicating with the doctors. There was a high level of trust in doctors among more  
37 than 80% of the participants. Comparison of the mean scores revealed that accessibility was a  
38 problem across ages, sexes, education and occupation groups. Communication barriers decreased with  
39 age and increased with education, but trust increased with age, but reduced with increasing education.  
40 Multivariable linear regression analysis revealed that difficulties in communication had a negative  
41 impact on trust ( $\beta = -0.63, p < 0.001$ ) and increasing education had a negative impact on trust ( $\beta = -$   
42  $0.42, p = 0.034$ ). **Conclusions:** The COVID 19 pandemic and the preventive strategies such as lock-  
43 down, physical distancing, face mask and personal protective equipment created barriers to effective  
44 doctor patient communication and led to some compromise in trust in doctors during this time.

45

46 Key words: COVID 19, doctor-patient communication, trust in doctors, face mask, PPE

47

48



49 **Introduction:**

50 The year 2020 has endured a global health crisis in the form of the COVID 19 pandemic.[1] The  
51 disease caused by the SARS CoV2 spread widely across the globe and infected millions and had a  
52 case fatality rate of around 1%.[2] The pandemic entered India in late January 2020 and held fort  
53 infecting a large number of people up till late October, when the number of cases started declining.[3]  
54 In early 2021, the possibility of a second wave of infections seems to be looming large. Countries  
55 responded to the pandemic with closure of air travel, strict quarantine rules, lockdowns to limit spread  
56 of infection and mandatory public health measures such as wearing masks in public, temperature  
57 monitoring, hand sanitizing practices and strict isolation and treatment of the infected in dedicated  
58 COVID 19 care facilities. India imposed one of the harshest lockdowns in the world. [4]

59

60 On one hand the infection was ravaging the population and on the other the stringent public health  
61 measures were having their own negative impact on people. One of the serious negative impact of the  
62 public health interventions has been restricted access to health facilities and lack of available  
63 treatments for non-COVID 19 illnesses in the public health system. Many routine public health  
64 activities suffered because of the high emphasis placed on COVID 19 prevention activities.[5]

65

66 Doctors and frontline health care providers are at particularly high risk of contracting COVID 19.[6]  
67 Therefore, there were major changes in the way front line health care workers delivered their services.  
68 Non-emergency surgeries were postponed. Frontline health workers were advised to wear masks and  
69 personal protective equipment (PPE) to safeguard themselves from the infection.[7] Physical distance  
70 was advised and so the doctor-patient encounters happened from a safe distance of about 1 meter.  
71 Doctors also limited the time they spent with the patients to effectively restrict the transmission of the  
72 illness. It is highly likely that these changes in the way that doctors delivered their services would  
73 have impacted on the effectiveness of the doctor-patient interaction.

74

75 This study was conducted to assess the difficulties faced by patients attending a tertiary care center in  
76 Chennai, in the doctor-patient communication during the peak of the COVID 19 pandemic and to  
77 study its influence on the trust in the doctor-patient relationship.

78

#### 79 **Materials and Methods:**

80 This study was conducted during July to September 2020, the peak of the COVID 19 pandemic, in  
81 Chennai, a metropolitan city in Tamil Nadu, a southern state in India. The study was conducted  
82 among persons attending a tertiary care hospital in the heart of the city. This hospital serves  
83 employees who are covered by the Employees State Insurance Scheme, which is one of the world's  
84 largest social security schemes serving employees who earn an average monthly income of less than  
85 INR 25,000 (USD 350).[8] The nationwide lockdown that was imposed in India on 24 March 2020  
86 was continued in Chennai over several spells.

87

88 Sample size was estimated to establish a 50% prevalence of difficulty in doctor-patient  
89 communication with a 10% relative precision and 95% confidence level as 384 participants. Non-  
90 probabilistic sampling, stratified by the place where the participants were interviewed, namely  
91 outpatient department, ward, COVID 19 isolation facility and hospital waiting area was performed.  
92 This was because, the patients in these locations represented various levels of severity and illness  
93 profile.

94

95 A questionnaire was developed by the study team for the purpose of this research comprising of three  
96 major domains namely, difficulties in accessing the health facility, difficulties faced in doctor-patient  
97 communication and trust in the doctors. The questionnaire items were shared with 5 experts in public

98 health, infectious diseases and nursing and content validated. A pilot test was done among a random  
99 sample of 40 participants and based on their inputs the wordings of the questionnaires were modified

100 to improve understanding. The questions were developed, content validated, and pilot tested in Tamil

101 language. The final data collection was also conducted in Tamil. After analysis, the questions were

102 translated to English for presentation.

103

104 Data collection was done using Google Forms, a web-based survey platform in the mobile hand-held  
105 device of the investigator KS. KS conducted all the interviews face to face after obtaining oral  
106 informed consent from the participants and documenting it on the Google Form. The collected data  
107 were exported to Microsoft Excel spreadsheet and cleaned by VG. The data were analyzed in the  
108 open-source statistical software GNU PSPP version 1.4.0. [9] The characteristics of the study  
109 population and responses to the various items in the Likert scale were described as frequencies and  
110 percentages. Reliability analysis was done by calculating the Cronbach's Alpha coefficient for  
111 internal consistency of the three sub-scales namely accessibility to health facility, difficulties in  
112 doctor-patient communication and trust in doctors. Exploratory factor analysis was performed.  
113 Extraction of factors was done by principal component method; rotation was performed by Varimax  
114 method. A three-factor solution explained 67% of the variance. The Bartlett's test of sphericity  
115 showed a model fit with a statistically significant Chi square value. The KMO test also indicated  
116 sampling adequacy. The factor loadings of the exploratory factor analysis were considered as weights  
117 of the various items in the sub-scales. The crude Likert response ranging from 0 – Disagree, 1 –  
118 somewhat disagree, 2 – neither agree nor disagree, 3 – somewhat agree, 4 – agree, were multiplied by  
119 the corresponding factor weights and a total sub-scale score was computed by adding the scores on  
120 each item in the sub-scale.

121

122 Independent sample t test and ANOVA were used to compare the mean scores on the three domains  
123 across sexes, age groups, educational and occupational groups. Multivariable linear regression  
124 analysis was performed with trust in doctors score as the dependent variable and communication  
125 difficulties, age, sex, education and occupation as independent variables.

126

127 The study was approved by the Institutional Ethics Committee of ESIC Medical College and  
128 PGIMSR, KK Nagar, Chennai after an expedited review process with the approval number  
129 IEC/2020/1/16 dated 29.07.2020. All interviews were conducted after obtaining oral informed  
130 consent. The Institutional Ethics Committee waived the requirement of a written informed consent in

131 order to minimize the use of potential fomites of transmission of COVID 19 through the paper and  
 132 pen on which the consent would be signed. The consent was documented in the Google Form survey  
 133 platform used for data collection. Adequate privacy was ensured for each interview.

134

135 **Results:**

136

137 A total of 390 individuals were approached for the study out of which 360 consented to participate  
 138 and responded to the questionnaire. The response rate was 92%. The 30 individuals who did not  
 139 respond gave the reasons as not willing and did not have time. Of the 360 who participated in the  
 140 study, 1 questionnaire was incomplete and therefore 359 data were available and taken up for  
 141 analysis. Table 1 shows the characteristics of the study sample. About half the participants (48.7%)  
 142 were in the 31-50 years age group. About 30% of the participants were younger than 31 years and  
 143 20% above 50 years. More than half (56%) of the participants were men. ~~A small proportion of~~ 24%  
 144 of the participants did not have any schooling and about 30% had studied beyond high school. About  
 145 12% were unemployed and 22% were home makers. Of the participants, 67% had sought some form  
 146 of medical care in the past one month and 11% had been diagnosed with COVID 19 in the recent past.

147

148 **Table 1: Characteristics of the Study Sample**

149

| S.No | Characteristic | Categories   | Number | Percentage |
|------|----------------|--------------|--------|------------|
| 1    | Age            | < 31 yrs     | 109    | 30.4%      |
|      |                | 31 – 50 yrs  | 175    | 48.7%      |
|      |                | 51 – 60 yrs  | 42     | 11.7%      |
|      |                | >60 yrs      | 32     | 8.9%       |
| 2    | Sex            | Male         | 201    | 56%        |
|      |                | Female       | 158    | 44%        |
| 3    | Education      | No schooling | 87     | 24.2%      |

|   |                                           |                                |     |       |
|---|-------------------------------------------|--------------------------------|-----|-------|
|   |                                           | Primary School                 | 49  | 13.6% |
|   |                                           | Middle School                  | 45  | 12.5% |
|   |                                           | High School                    | 69  | 19.2% |
|   |                                           | Diploma                        | 32  | 8.9%  |
|   |                                           | Under graduation               | 65  | 18.1% |
|   |                                           | Postgraduation                 | 12  | 3.3%  |
| 4 | Occupation                                | Unemployed                     | 43  | 12%   |
|   |                                           | Home Maker                     | 81  | 22.6% |
|   |                                           | Manual Laborer                 | 52  | 14.5% |
|   |                                           | Skilled worker                 | 20  | 5.6%  |
|   |                                           | Shopkeeper /<br>Small Business | 53  | 14.8% |
|   |                                           | Clerical                       | 86  | 24%   |
|   |                                           | Professional                   | 24  | 6.7%  |
| 5 | Sought health care in<br>the past 1 month | Yes                            | 242 | 67.4% |
| 6 | Were you diagnosed<br>with COVID 19?      | Yes                            | 40  | 11.1% |

150

151

152 In keeping with the main objectives of this study, the participants who consented to take part, were  
153 asked a set of 19 questions covering the key domains of accessibility, trust in doctors and problems in  
154 doctor-patient communication during the pandemic times. Their responses to the Likert scale are  
155 shown in Table 2. More than 60% of the participants responded affirmatively that they had difficulties  
156 in accessing the health facilities due to the lockdown. Similarly, more than 60% of the participants  
157 said that they faced difficulties in establishing good doctor-patient communications due to the  
158 physical distance, mask, personal protective equipment (PPE) and often did not understand the

159 instructions given by the doctors. However, a large proportion of the participants (more than 80%)  
 160 responded that they had a high level of trust in their doctors as indicated by high level of respect, trust  
 161 that the doctors do what is in the patients' best interest, and the opinion that the doctor has high  
 162 integrity.

163

164 **Table 2: Responses to questions related to health care access, doctor-patient communication and**

165 **trust in doctors during COVID 19 times**

166

| S.No | Question                                                                                 | Disagree       | Somewhat Disagree | Neither agree nor | Somewhat agree | Agree          |
|------|------------------------------------------------------------------------------------------|----------------|-------------------|-------------------|----------------|----------------|
| 1    | As all nearby clinics were closed due to lockdown it was difficult to access health care | 45<br>(12.5%)  | 4 (1.1%)          | 74<br>(20.6%)     | 21 (5.8%)      | 215<br>(59.9%) |
| 2    | As all transport facilities were suspended it was difficult to access health facilities  | 45<br>(12.5%)  | 1 (0.3%)          | 73<br>(20.3%)     | 23 (6.4%)      | 217<br>(60.4%) |
| 3    | As doctors practice physical distancing, it was difficult interacting with them          | 89<br>(24.8%)  | 2 (0.6%)          | 23 (6.4%)         | 105<br>(29.2%) | 140<br>(39%)   |
| 4    | As doctors wear mask and PPE it is difficult to interact with them                       | 89<br>(24.8%)  | 2 (0.6%)          | 22 (6.1%)         | 105<br>(29.2%) | 141<br>(39.3%) |
| 5    | Doctors do not spend much time with patients due to fear of infection                    | 191<br>(53.2%) | 14 (3.9%)         | 19 (5.3%)         | 55<br>(15.3%)  | 80<br>(22.3%)  |
| 6    | Doctors do not touch the patients and so treatment feels inadequate                      | 148<br>(41.2%) | 8 (2.2%)          | 35 (9.7%)         | 75<br>(20.9%)  | 93<br>(25.9%)  |

|    |                                                                                                      |                |           |                |                |                |
|----|------------------------------------------------------------------------------------------------------|----------------|-----------|----------------|----------------|----------------|
| 7  | Due to the physical distance and the PPE we are unable to understand the instructions of the doctors | 96<br>(26.7%)  | 5 (1.4%)  | 23 (6.4%)      | 113<br>(31.5%) | 122<br>(34%)   |
| 8  | Due to too much focus on COVID 19 doctors are not paying much attention to other illnesses           | 234<br>(65.2%) | 11 (3.1%) | 28 (7.8%)      | 22 (6.1%)      | 64<br>(17.8%)  |
| 9  | As doctors have reduced giving injections, treatment feels inadequate                                | 83<br>(23.1%)  | 4 (1.1%)  | 182<br>(50.7%) | 25 (7%)        | 65<br>(18.1%)  |
| 10 | Nowadays we do not have a choice of doctors or hospitals                                             | 48<br>(13.4%)  | 2 (0.6%)  | 60<br>(16.7%)  | 56<br>(15.6%)  | 193<br>(53.8%) |
| 11 | Nowadays we are unable to trust that everything will be alright if we consult the doctor             | 246<br>(68.5%) | 8 (2.2%)  | 10 (2.8%)      | 51<br>(14.2%)  | 44<br>(12.3%)  |
| 12 | I trust that the doctor has my best interest in mind                                                 | 49<br>(13.6%)  | 12 (3.3%) | 7 (1.9%)       | 43 (12%)       | 248<br>(69.1%) |
| 13 | I trust that the doctor is honest                                                                    | 24<br>(6.7%)   | 7 (1.9%)  | 11 (3.1%)      | 19 (5.3%)      | 298<br>(83%)   |
| 14 | I trust that the doctor's advice is for my benefit                                                   | 29<br>(8.1%)   | 4 (1.1%)  | 12 (3.3%)      | 21 (5.8%)      | 293<br>(81.6%) |
| 15 | I trust that the doctor works for my best interest even during the pandemic times                    | 34<br>(9.5%)   | 4 (1.1%)  | 22 (6.1%)      | 33 (9.2%)      | 266<br>(74.1%) |
| 16 | As these are pandemic times I can understand why doctors and                                         | 40<br>(11.1%)  | 4 (1.1%)  | 18 (5%)        | 45<br>(12.5%)  | 252<br>(70.2%) |

|    |                                                                                                         |                |          |           |               |                |
|----|---------------------------------------------------------------------------------------------------------|----------------|----------|-----------|---------------|----------------|
|    | hospitals are acting in a precautionary manner                                                          |                |          |           |               |                |
| 17 | As doctors and hospitals are also suffering a financial crisis, I understand the high cost of treatment | 278<br>(77.4%) | 7 (1.9%) | 34 (9.5%) | 27 (7.5%)     | 13<br>(3.6%)   |
| 18 | As doctors are overworked, I can understand if they are rude to me.                                     | 111<br>(30.9%) | 1 (0.3%) | 2 (0.6%)  | 64<br>(17.8%) | 181<br>(50.4%) |
| 19 | I respect the doctor a lot                                                                              | 22<br>(6.1%)   | 3 (0.8%) | 7 (1.9%)  | 35 (9.7%)     | 292<br>(81.3%) |

167

168 The reliability of the three domains of the scale were assessed using Cronbach's alpha test of internal  
169 consistency. The Cronbach's Alpha for the accessibility dimension was 0.870, Doctor-patient  
170 communication dimension was 0.930 and trust in doctors dimension was 0.780. Therefore, all the  
171 three dimensions had acceptable levels of internal consistency reliability. The findings of the  
172 exploratory factor analysis are shown in Table 3. It is seen that the three dimensions are separated  
173 appropriately with good factor loadings all above 0.4, indicating good structural validity of the scale.  
174 The respective factor loadings were considered as the weight for each of the items and the Likert  
175 response from 0 – 4 was multiplied by the factor weight of that item and then added up to generate the  
176 total score in that dimension for each participant.

177

178



179 Table 3: Exploratory Factor Analysis showing the grouping of variables into three dimensions

180 and their factor weights

181

| Items                                                                                                | Trust in the doctor | Accessibility | Doctor-patient communication |
|------------------------------------------------------------------------------------------------------|---------------------|---------------|------------------------------|
| As all nearby clinics were closed due to lockdown it was difficult to access health care             |                     | .94           |                              |
| As all transport facilities were suspended it was difficult to access health facilities              |                     | .92           |                              |
| As doctors practice physical distancing, it was difficult interacting with them                      |                     |               | .93                          |
| As doctors wear mask and PPE it is difficult to interact with them                                   |                     |               | .94                          |
| Doctors do not spend much time with patients due to fear of infection                                |                     |               | .50                          |
| Doctors do not touch the patients and so treatment feels inadequate                                  |                     |               | .71                          |
| Due to the physical distance and the PPE we are unable to understand the instructions of the doctors |                     |               | .92                          |
| Due to too much focus on COVID 19 doctors are not paying much attention to other illnesses           |                     |               | .39                          |
| As doctors have reduced giving injections, treatment feels inadequate                                |                     |               | .67                          |
| Nowadays we do not have a choice of doctors or hospitals                                             |                     | .75           |                              |
| Nowadays we are unable to trust that everything will be alright if we consult the doctor             | -.75                |               |                              |

| Items                                                                                                       | Trust in the doctor | Accessibility | Doctor-patient communication |
|-------------------------------------------------------------------------------------------------------------|---------------------|---------------|------------------------------|
| I trust that the doctor has my best interest in mind                                                        | .77                 |               |                              |
| I trust that the doctor is honest                                                                           | .92                 |               |                              |
| I trust that the doctors advice is for my benefit                                                           | .93                 |               |                              |
| I trust that the doctor works for my best interest even during the pandemic times                           | .91                 |               |                              |
| As these are pandemic times I can understand why doctors and hospitals are acting in a precautionary manner | .87                 |               |                              |
| As doctors are overworked, I can understand if they are rude to me.                                         | .65                 |               |                              |
| I respect the doctor a lot                                                                                  | .86                 |               |                              |

182

183 Table 4 shows the mean score in each dimension. It is seen that the mean score was high in both the  
184 inaccessibility domain and the trust in the doctors domain, whereas it was around the middle in the  
185 doctor-patient communication difficulties domain.

186

187 **Table 4: Weighted scores on the dimensions of accessibility, communication and trust**

188

| S.No | Dimension (minimum and maximum possible scores)   | Mean Score | SD   |
|------|---------------------------------------------------|------------|------|
| 1    | Inaccessibility to Health Facilities (0 – 10.44)  | 7.81       | 3.89 |
| 2    | Doctor-Patient Communication problems (0 – 20.24) | 10.88      | 6.87 |
| 3    | Trust in the doctor (0 – 20.64)                   | 18.96      | 7.52 |

189

190 In order to study the various factors influencing the score in each domain, the mean scores were  
 191 compared between sexes, age groups, education groups and type of occupation. This is shown in  
 192 Table 5. It is seen that males had greater trust in physicians than women, whereas there was no  
 193 significant sex difference in the accessibility and communication barriers. With increasing age there  
 194 was increasing trust in the doctor, reducing difficulties in doctor-patient communication and  
 195 increasing inaccessibility to health facilities, all of which were statistically significant. With  
 196 increasing education levels, trust in the doctors seemed to reduce, difficulties in doctor-patient  
 197 communication seemed to increase and inaccessibility to health facilities decreased, and all these were  
 198 statistically significant associations. Such a strong and clear association was not seen with occupation.  
 199

200 **Table 5: Comparison of Accessibility, doctor-patient communication and trust in doctors based**  
 201 **on characteristics of the participants**

202

| S.No | Characteri<br>stic | Categories  | Trust in<br>Doctor<br>Scores<br>(mean ±<br>SD) | p value | Doctor<br>patient<br>communicati<br>on problems<br>(mean ± SD) | p value | Accessibili<br>ty<br>(mean ±<br>SD) | p<br>value |
|------|--------------------|-------------|------------------------------------------------|---------|----------------------------------------------------------------|---------|-------------------------------------|------------|
| 1    | Sex                | Male        | 18.28 ±<br>8.20                                | <0.001* | 11.09 ± 7.14                                                   | 0.110   | 7.88 ± 3.44                         | 0.340      |
|      |                    | Female      | 19.82 ±<br>6.46                                |         | 10.61 ± 6.52                                                   |         | 7.72 ± 3.10                         |            |
| 2    | Age                | <= 30 yrs   | 17.77 ±<br>7.78                                | 0.020*  | 12.17 ± 6.82                                                   | 0.001*  | 7.53 ± 3.57                         | 0.360      |
|      |                    | 31 – 50 yrs | 18.87 ±<br>7.94                                |         | 10.84 ± 6.64                                                   |         | 7.78 ± 3.49                         |            |

|   |            |                     |                 |          |              |             |                |        |
|---|------------|---------------------|-----------------|----------|--------------|-------------|----------------|--------|
|   |            | 51 – 60 yrs         | 20.28 ±<br>5.21 |          | 10.60 ± 6.85 |             | 8.11 ± 3.17    |        |
|   |            | >60 yrs             | 22.12 ±<br>4.79 |          | 6.77 ± 6.85  |             | 8.65 ± 2.69    |        |
| 3 | Education  | Uneducated          | 21.16 ±<br>5.78 | < 0.001* | 8.87 ± 6.70  | <<br>0.001* | 8.46 ± 2.85    | 0.047* |
|   |            | Primary School      | 21.06 ±<br>6.13 |          | 9.65 ± 6.98  |             | 8.34 ± 3       |        |
|   |            | Middle School       | 18.79 ±<br>8.99 |          | 10.14 ± 7.22 |             | 8.04 ± 3.35    |        |
|   |            | High School         | 19.30 ±<br>7.95 |          | 11.26 ± 6.81 |             | 7.41 ± 3.77    |        |
|   |            | Diploma             | 17.92 ±<br>6.81 |          | 11.55 ± 6.86 |             | 7.66 ± 3.03    |        |
|   |            | Undergradua<br>tion | 15.42 ±<br>8.10 |          | 13.52 ± 6.20 |             | 7.27 ± 3.26    |        |
|   |            | Post<br>Graduation  | 14.93 ±<br>5.81 |          | 15.04 ± 4.10 |             | 5.70 ± 4.14    |        |
| 4 | Occupation | Unemployed          | 18.05 ±<br>7.81 | <0.001*  | 11.34 ± 6.92 | 0.093       | 7.80 ± 3.27    | 0.264  |
|   |            | Home Maker          | 21.34 ±<br>5.28 |          | 9.51 ± 6.87  |             | 8.18 ± 3.02    |        |
|   |            | Manual<br>Labourer  | 18.71 ±<br>8.84 |          | 10.56 ± 7.04 |             | 8.17 ± 3.17    |        |
|   |            | Skilled<br>Worker   | 21.03 ±<br>6.02 |          | 9.95 ± 6.23  |             | 7.20 ±<br>4.18 |        |

|  |  |                                   |                 |  |              |  |             |  |
|--|--|-----------------------------------|-----------------|--|--------------|--|-------------|--|
|  |  | Shopkeeper /<br>Small<br>Business | 20.04 ±<br>6.57 |  | 10.18 ± 6.26 |  | 7.15 ± 3.13 |  |
|  |  | Clerical                          | 17.23 ±<br>8.38 |  | 11.99 ± 7.31 |  | 8.10 ± 3.42 |  |
|  |  | Professional                      | 15.10 ±<br>7.50 |  | 13.73 ± 5.71 |  | 6.74 ± 3.42 |  |

203

204 Figure 1 shows the association between problems in doctor-patient communication and the trust in the  
 205 doctors. The scatter plot shows a negative correlation of reducing trust in the doctor with increasing  
 206 barriers in doctor-patient communication.

207

208 **Figure 1: Association between Problem with communication and trust in doctors**

209

210 Multivariable linear regression to study the association between difficulty in doctor-patient  
 211 communication and trust in physicians after adjusting for age, education and occupation confirmed  
 212 the negative association between difficulty in doctor-patient communication and trust in the  
 213 physicians. It was further seen that age and occupation did not have an influence on trust, but  
 214 education was also negatively associated with trust, increasing education leading to lesser trust in the  
 215 doctors. This multivariate linear regression is shown in Table 6.

216

217 **Table 6: Association between doctor patient communication and trust in the doctors**

| Factors influencing trust scores   | Beta Coefficient | 95% CI           | p value |
|------------------------------------|------------------|------------------|---------|
| Doctor-patient communication score | -0.630           | -0.730 to -0.540 | <0.001* |
| Age                                | 0                | -0.05 to 0.05    | 0.932   |

|            |        |                  |        |
|------------|--------|------------------|--------|
| Sex        | 0.840  | -0.480 to 2.170  | 0.213  |
| Education  | -0.420 | -0.810 to -0.030 | 0.034* |
| Occupation | -0.07  | -0.440 to 0.300  | 0.695  |

218

219 **Discussion**

220 This cross-sectional survey among patients attending a tertiary care facility in Chennai showed that a  
 221 majority of them faced difficulties in accessing health care facilities due to the lockdown. Many of  
 222 them found it difficult to communicate with their doctors due to the physical distancing, personal  
 223 protective equipment and limited time spent with them due to COVID 19 advisories. Despite this  
 224 inaccessibility and difficulty in communicating with the doctors, their trust in doctors remained high  
 225 even during the COVID 19 pandemic times. Further it was noted that men had greater trust in the  
 226 doctors. With increasing age, trust in doctors increased but difficulty in communication decreased and  
 227 with increasing education levels trust in doctors decreased and difficulties in communication  
 228 increased. There was a relatively strong negative correlation between doctor-patient communication  
 229 barriers and trust in the doctors.

230

231 COVID 19 laid bare the weakness of the public health system in India. The lockdown impaired the  
 232 access to healthcare facilities that were already inaccessible to many poor and marginalized people in  
 233 the country. Many parts of the country faced serious limitations in access to health care during the  
 234 pandemic for non-COVID 19 illnesses.[10] There were even reports of interruption of treatment for  
 235 chronic non communicable diseases due to access issues. [11] Though this was a universal  
 236 phenomenon, the urban slums in low- and middle-income countries were worse affected by this lack  
 237 of access to health facilities. [12] Chennai city was a hot spot of transmission of COVID 19, and  
 238 lockdowns were imposed very early during the pandemic. This lack of access related to the lockdown  
 239 was reported in this study too. It was observed that this lack of access was perceived by people of  
 240 both sexes, all age groups and across all educational and occupational classes. Even people who had  
 241 their own private vehicles, found it difficult to get past the strict curfew and make it to health  
 242 facilities.

243

244 Several studies have reported the difficulty in doctor-patient communication during the COVID 19  
245 times. A study from Africa pointed out that patients perceived that physical distancing and personal  
246 protective equipment impaired the doctor-patient relationship. [13] Patients, especially the elderly, felt  
247 apprehensive communicating with doctors covered in PPE and this worsened their anxiety in the  
248 hospital. [14] Firstly, the mask and PPE covered the human face of the doctor. This created a sense of  
249 disconnect between the doctor and the patient. **Covering the face with the mask prevented the doctors**  
250 **from expressing any facial cues including empathy, compassion, kindness all of which could be very**  
251 **effectively communicated by facial expressions. Moreover, individuals who are hearing and speech**  
252 **disabled, depend largely on lip reading for communicating with their doctor. The mask and head gear**  
253 **prevented these patients from reading the lips of their doctors.** These greatly impaired the doctor-  
254 patient communication. [15] In this study also patients reported that the mask, PPE and physical  
255 distancing impaired effective communication with their doctors. It would be natural to expect that  
256 these communication issues would worsen with increasing age as older individuals are more likely to  
257 have vision and hearing difficulties. However, it was observed in this study that the communication  
258 problems were reported more among the younger individuals and it reduced with increasing age. One  
259 possible explanation for this could be that the younger individuals were more demanding and  
260 expecting of clear communication from their doctors compared to the elderly. It is also possible that  
261 the lack of clear communication was routine among the elderly, and they did not find it different with  
262 the mask, PPE and physical distance.

263

264 The third important finding of the study was high levels of trust in the doctors, despite poor  
265 accessibility and difficulty in doctor-patient communication. One other previous empirical evaluation  
266 of trust in doctors in Tamil Nadu, close to the study setting, also revealed a high level of trust in  
267 doctors. [16] While there have been reports of eroding trust in physicians and the health system in the  
268 United States during the COVID 19 times because of a lack of consistent public health messaging on  
269 hydroxychloroquine and masks in the country, such a pattern of lack of trust has not been seen in  
270 India. [17, 18] The dimensions of trust in physicians in a low- and middle-income country setting like

271 India have been explored in the past and the key dimensions are perceived competence, assurance of  
272 treatment, respect and loyalty. [19] It is seen that even though many patients were deprived of the  
273 assurance of good quality treatment, the overriding dimensions of respect and loyalty, ensured that  
274 they retained the basic trust in doctors. In this study the items including, 'I trust that the doctor is  
275 honest', 'I trust that the doctor works for my best interest even during the pandemic times' and 'I  
276 respect the doctor a lot' had a high rate of affirmative response. This indicated the high level of trust  
277 in the doctors. It was also observed in this study that women had greater trust than men, trust in  
278 doctors increased with age, and people with higher education had lower trust levels. Those who were  
279 home makers, unemployed and manual laborers had greater trust compared to those who were in  
280 business, clerical work and professional jobs.

281

282 In a previous study of factors affecting trust in the doctor-patient relationship, it was noted that the  
283 doctor-patient communication including a personal involvement of the doctor with the patient greatly  
284 influenced the trust. [20] Based on this premise, this study attempted to explore the association  
285 between doctor-patient communication during COVID 19 times and the trust in doctors. A relatively  
286 strong inverse association was established in this study. Those who perceived greater difficulties in  
287 communication with their physician also reported lesser trust in their physicians. Even after adjusting  
288 for age, sex, education and occupation, it was seen that difficulty in communication remained  
289 negatively associated with trust in the doctors.

290

291 The strength of this study is that it was conducted during the peak of the COVID 19 pandemic among  
292 patients attending a tertiary care center to understand a crucial aspect of the doctor-patient relationship  
293 during the difficult pandemic times. The calculated sample size was 384, however, only a sample size  
294 of 359 could be achieved and analyzed. Another possible limitation could be a socially desirable  
295 response bias, as the interviews were conducted by the researchers in a health care facility. Despite  
296 these limitations, the study helps document an important dimension of the doctor patient relationship  
297 during the COVID 19 pandemic, namely communication and trust.

298



299 The COVID 19 experience has taught us that during pandemic times, while it is important to focus on  
300 public health measures, it is equally important to keep people at the center of the health care  
301 enterprise. All public health and disease prevention interventions must be people centered and focus  
302 on the welfare of the people. [21]This study further contributed to this idea by clearly indicating that  
303 doctor-patient communication and trust are very important considerations during pandemic times.

304

305 **Acknowledgments:**

306 The authors would like to acknowledge the participants in the study for their valuable insights in their  
307 experiences of doctor-patient relationships during the COVID 19 pandemic.

308 **References:**

- 309 1. Pollard CA, Morran MP, Nestor-Kalinoski AL (2020) The COVID-19 pandemic: a  
310 global health crisis. *Physiological Genomics*.  
311 <https://doi.org/10.1152/physiolgenomics.00089.2020>
- 312 2. Philip M, Ray D, Subramanian S (2020) Decoding India's Low Covid-19 Case  
313 Fatality Rate. *Journal of Human Development and Capabilities*.  
314 <https://doi.org/10.1080/19452829.2020.1863026>
- 315 3. Worldometers (2021) Coronavirus cases in India. In:  
316 <https://www.worldometers.info/coronavirus/country/india/>.
- 317 4. Ruckmini S (2020) India had one of the world's strictest lockdowns. Why are cases  
318 still rising? *The Guardian*
- 319 5. WHO Headquarters (2020) Pulse survey on continuity of essential health services  
320 during the COVID-19 pandemic . Geneva
- 321 6. Karlsson U, Fraenkel C-J (2020) Covid-19: risks to healthcare workers and their  
322 families. *BMJ*. <https://doi.org/10.1136/bmj.m3944>
- 323 7. Ministry of Health and Family Welfare (2020) Novel Coronavirus Disease 2019  
324 (COVID-19): Guidelines on rational use of Personal Protective Equipment. New Delhi
- 325 8. Prinja S, Kaur M, Kumar R (2012) Universal Health Insurance in India: Ensuring  
326 equity, efficiency, and quality. *Indian Journal of Community Medicine*.  
327 <https://doi.org/10.4103/0970-0218.99907>
- 328 9. Free Software Foundation (2020) GNU PSPP.
- 329 10. Kumar A, Rajasekharan Nayar K, Koya SF (2020) COVID-19: Challenges and its  
330 consequences for rural health care in India. *Public Health in Practice* 1:100009

- 331 11. Yadav UN, Rayamajhee B, Mistry SK, Parsekar SS, Mishra SK (2020) A Syndemic  
332 Perspective on the Management of Non-communicable Diseases Amid the COVID-19  
333 Pandemic in Low- and Middle-Income Countries. *Frontiers in Public Health* 8:508
- 334 12. Fayehun F, Harris B, Griffiths F (2020) COVID-19: how lockdowns affected health  
335 access in African and Asian slums. *Prevention Web*
- 336 13. Nwoga HO, Ajuba MO, Ezeoke UE (2020) Effect of COVID-19 on doctor-patient  
337 relationship. *International Journal Of Community Medicine And Public Health*.  
338 <https://doi.org/10.18203/2394-6040.ijcmph20205136>
- 339 14. Sturme y G, Wiltshire M (2020) Patient perspective: Gordon Sturme y and Matt  
340 Wiltshire. *BMJ*. <https://doi.org/10.1136/bmj.m1814>
- 341 15. Samarasekara K (2020) ‘Masking’ emotions: doctor–patient communication in the  
342 era of COVID-19. *Postgraduate Medical Journal*.  
343 <https://doi.org/10.1136/postgradmedj-2020-138444>
- 344 16. Baidya M, Gopichandran V, Kosalram K (2014) Patient-physician trust among adults  
345 of rural Tamil Nadu: A community-based survey. *Journal of Postgraduate Medicine*  
346 60:21–26
- 347 17. Khullar D, Darien G, Ness DL (2020) Patient Consumerism, Healing Relationships,  
348 and Rebuilding Trust in Health Care. *JAMA*. <https://doi.org/10.1001/jama.2020.12938>
- 349 18. Montgomery T, Berns JS, Braddock CH (2020) Transparency as a Trust-Building  
350 Practice in Physician Relationships With Patients. *JAMA*.  
351 <https://doi.org/10.1001/jama.2020.18368>
- 352 19. Gopichandran V, Chetlapalli SK (2013) Dimensions and determinants of trust in  
353 health care in resource poor settings--a qualitative exploration. *PloS one* 8:e69170

- 354 20. Gopichandran V, Chetlapalli SK (2013) Factors influencing trust in doctors: a  
355 community segmentation strategy for quality improvement in healthcare. *BMJ open*  
356 3:e004115
- 357 21. Gopichandran V (2020) Clinical ethics during the Covid-19 pandemic: Missing the  
358 trees for the forest. *Indian Journal of Medical Ethics*.  
359 <https://doi.org/10.20529/IJME.2020.053>  
360

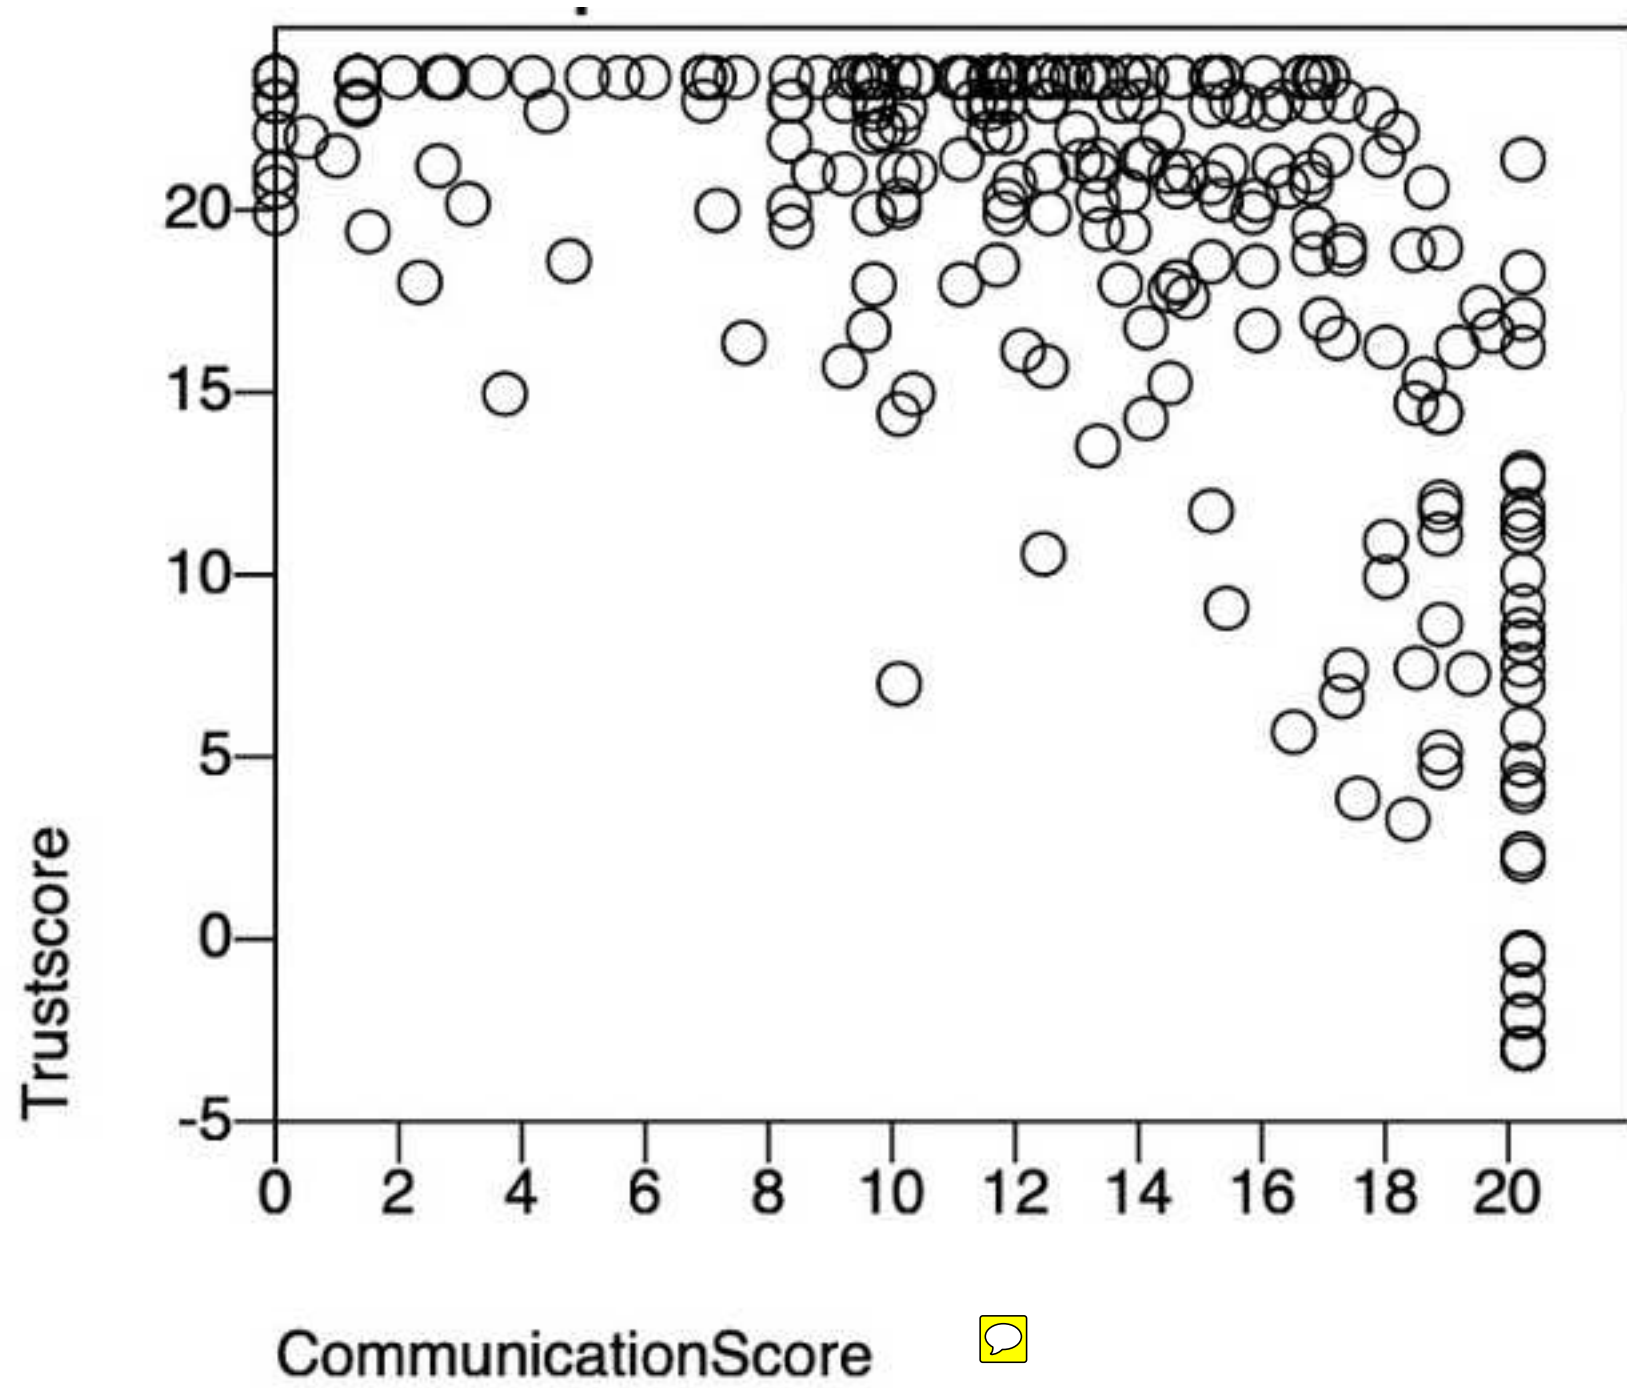

Supplement: pone.0253497.s001.pdf [file pone.0253497.s001.pdf]
